# Supplementary material for: NAD+ prevents septic shock-induced death by non-canonical inflammasome blockade and IL-10 cytokine production in macrophages
Source: eLife journal article supplement (doi:10.7554/elife.88686), 2023-08-16
Supplement: fig2-data1 [file elife-88686-fig2-data1-v1.zip]

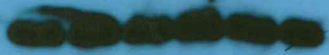

7

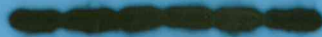

7

GDD

L

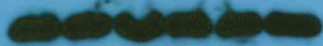

910 ->  
11 ->

7

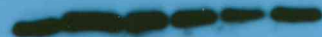

7

Handwritten notes and symbols on the right side of the page, including a checkmark, a cross, and the word "comp".
