# Supplementary material for: NAD+ prevents septic shock-induced death by non-canonical inflammasome blockade and IL-10 cytokine production in macrophages
Source: eLife journal article supplement (doi:10.7554/elife.88686), 2023-08-16
Supplement: fig2-data1 [file elife-88686-fig2-data1-v1.zip]

1C-1 Beta

NFkB

-----

IL-1

IL-1

IL-1

IL-1
