# Supplementary material for: NAD+ prevents septic shock-induced death by non-canonical inflammasome blockade and IL-10 cytokine production in macrophages
Source: eLife journal article supplement (doi:10.7554/elife.88686), 2023-08-16
Supplement: fig2-data4 [file Figure 2 Source Data 3 Fig. 2C Caspase Staining Graph Data.xlsx]

## Sheet: Tabelle1
Figure 2
C)	4h		16h
	PBS	NAD+	PBS	NAD+	unstim
	461	30	29	97	0
	1051	36	35	198	0
	1044	29	46	105	4
	1124	105	53	65
	1126	98	49	151
	1014	248	24	149
	1099	56	25	50
	1348	73	6	116
	1015	84	33	96
	802	79	16	121
