# Supplementary material for: NAD+ prevents septic shock-induced death by non-canonical inflammasome blockade and IL-10 cytokine production in macrophages
Source: eLife journal article supplement (doi:10.7554/elife.88686), 2023-08-16
Supplement: fig2-data6 [file Figure 2 Source Data 5 Fig. 2E LPS Transfection.xlsx]

## Sheet: Tabelle1
Figure 2
E)
	control	PBS	NAD+		NAD+	Ctrl	PBS
	64	3227	7355		21.6	2.3	24.6
	660	3410	7866		25.6	1.6	20.6
	764	1169	6470		24.9	1.8	21.2
	245	4458	2615		19.2	1.6	20.9
	260	1454	1376		25.4	1.6	24.4
	305	3947	693
	372	3752	1124
	465	2043	2804
	247	1511	3423
	687	2208	3064
	750	5105	1128
