# Supplementary material for: NAD+ prevents septic shock-induced death by non-canonical inflammasome blockade and IL-10 cytokine production in macrophages
Source: eLife journal article supplement (doi:10.7554/elife.88686), 2023-08-16
Supplement: fig3-data2 [file elife-88686-fig3-data2-v1.zip]

STAT1

08-27-29

PSYCH PACH

STAT1

38

39

STAT1

STAT1

STAT1

38

39
