# Supplementary material for: NAD+ prevents septic shock-induced death by non-canonical inflammasome blockade and IL-10 cytokine production in macrophages
Source: eLife journal article supplement (doi:10.7554/elife.88686), 2023-08-16
Supplement: fig5-data3 [file Figure 5 Source Data 3 Fig. 5C FACS CD4 and CD8 T cells.xlsx]

## Sheet: Tabelle1
Figure 5
C)
	CD4+			CD8+
	PBS	NAD+		PBS	NAD+
	0.763889	1.43519		0.709924	2.56489
	0.925926	1.57407		0.770992	2.09924
	0.99537	1.50463		0.89313	1.72519
	1.08796	1.36574		1.21374	1.99237
	1.22685	1.45833		1.41221	1.82443
