# Supplementary material for: NAD+ prevents septic shock-induced death by non-canonical inflammasome blockade and IL-10 cytokine production in macrophages
Source: eLife. 2024 Feb 19;12:RP88686. doi: 10.7554/eLife.88686 (PMC10942599; doi:10.7554/eLife.88686)
Supplement: Figure 1—figure supplement 2—source data 1. [file elife-88686-fig1-figsupp2-data1.xlsx]

## Sheet: Tabelle1
Supplementary Figure 4
	ileum			kidney			lung			liver
	PBS	NAD+		PBS	NAD+		PBS	NAD+		PBS	NAD+
	95	30		50	25		105	35		95	67
	60	37		61	31		131	19		112	80
	55	58		100	18		78	51		86	59
	52	19		60	16		85	37		130	55
				65	32		93	31		109	61
