# Supplementary material for: NAD+ prevents septic shock-induced death by non-canonical inflammasome blockade and IL-10 cytokine production in macrophages
Source: eLife. 2024 Feb 19;12:RP88686. doi: 10.7554/eLife.88686 (PMC10942599; doi:10.7554/eLife.88686)
Supplement: Figure 1—source data 1. [file elife-88686-fig1-data1.xlsx]

## Sheet: Tabelle1
Figure 1
B)	kidney				liver
	PBS	NAD+			PBS	NAD+
	8.97415	8.98966			8.06277	7.96011
	9.01424	9.24971			8.4655	8.33067
	8.96717	8.62089			7.98532	7.41238
