# Supplementary material for: NAD+ prevents septic shock-induced death by non-canonical inflammasome blockade and IL-10 cytokine production in macrophages
Source: eLife. 2024 Feb 19;12:RP88686. doi: 10.7554/eLife.88686 (PMC10942599; doi:10.7554/eLife.88686)
Supplement: Figure 1—source data 2. [file elife-88686-fig1-data2.xlsx]

## Sheet: Tabelle1
Figure 1
C)
	PBS			NAD+
	Time	Death		Time	Death
	3.5	1		48	0
	3.75	1		48	0
	4	1		48	0
	4	1		48	0
	4.25	1		48	0
	4.75	1		48	0
	5.25	1		36	1
