# Supplementary material for: NAD+ prevents septic shock-induced death by non-canonical inflammasome blockade and IL-10 cytokine production in macrophages
Source: eLife. 2024 Feb 19;12:RP88686. doi: 10.7554/eLife.88686 (PMC10942599; doi:10.7554/eLife.88686)
Supplement: Figure 1—source data 3. [file elife-88686-fig1-data3.xlsx]

## Sheet: Tabelle1
Figure 1
D)	LPS O55:B5
		Temperature														PBS			NAD+
	Time	PBS						NAD+								Time	Death		Time	Death
	0	36.5	36.6	36.2	36.8	35.9	36.1	36.6	36	36.8	36.4	35.7	36.7			20	1		100	0
	1															22	1		100	0
	2	36.2	35.6	35.8	35.9	35.4	35.7	35.8	35.7	35.7	37.1	35.4	34.9			22	1		100	0
	3															24	1		100	0
	4	34.7	35.1	34.6	34.8	34.8	35.2	34	35.2	32.6	34	34.5	34.3			24	1		100	0
	5															26	1		44	1
	6	33.5	32.4	32.5	31.3	31.3	32	32.3	33.6	32.8	32.3	34.7	33.1
	7
	8	28	27.6	27.8	29.8	28	29.9	31.7	33.4	32.2	32.2	34.1	31.9
	9
	10	27.6	26.1	27.5	26.9	27.6	27.5	31	33.2	32.2	31.8	34.1	31.4
	11
	12	26.5	25.6	26.3	25.1	25	25.7	30.7	33.4	32	31.1	33.7	29.9
	13
	14	25.8	24.5	25.8	24.3	24.6	25.5	31.1	33.3	32.6	30.7	34.5	30.1
	15
	16	25.1	23.3	24.3	23.2	23.4	24.3	31.1	33.2	32.8	30.4	33.9	30.4
	17
	18	24.1	23.2	23.1	23.3	23.6	23.9	31	33.1	32.3	31.7	34.7	31
	19
	20		23.3	23.3	23.6	23.5	23.6	32.1	33.4	32.2	31.7	35.1	31.4
	21
	22		23.4	23.3	23.2			32	33.3	31.7	31.1	35	31.5
	23
	24				23.5			32.1	33.7	31.4	31	34.7	31
	25
	26
	27
	28							31.1	32.5	31.1	30.9	34.9	29.5
	29
	30
	31
	32
	33
	34							30.1	30.3	29.6	30.3	34.6	29.6
	35
	36
	37
	38							30.4	30.3	30.1	32	34.8	29.7
	39
	40
	41
	42
	43
	44							30.7	30.7	30.9	32.1	36.1
	45
	46
	47
	48							30.5	30.1	30.7	31.3	35.9
	49
	50
	51
	52							30.3	29.9	30.9	30.8	36.1
	53
	54
	55
	56
	57
	58
	59
	60							30.3	29.9	30.9	30.8	36.1
	61
	62
	63
	64
	65
	66
	67
	68
	69
	70							33.9	32.6	32.5	32.8	36.5
	71
	72
	73
	74
	75
	76
	77
	78
	79
	80							33.6	31.4	31.9	32.9	36.3
	81
	82
	83
	84
	85
	86							33.8	31.8	32.5	33.7	36.2
	87
	88
	89
	90
	91
	92
	93
	94							35.5	33.3	34.1	34.5	36.3
	95
	96
	97
	98
	99
	100							35.7	34.2	35	34.9	36.6
	LPS O111:B4
		Temperature														PBS			NAD+
	Time	PBS						NAD+								Time	Death		Time	Death
	-1															16	1		48	0
	0	35.9	36.4	36.4	36.5	36.6	35.8	36	35.8	36.4	36.4	36.1	36.3			16	1		48	0
	1															18	1		48	0
	2															18	1		48	0
	3															18	1		48	0
	4	26.8	27	26.7	28.1	27.6	27.3	34	35.2	32.6	34	34.5	34.3			20	1		28	1
	5
	6
	7
	8	24.3	24.6	24.1	24.4	24.6	24.4	27.1	26.7	27.3	26.9	26.8	26.8
	9
	10
	11
	12	23.5	23.4	23.6	23.3	23	23.4	26.2	25.8	26.7	26.1	25.4	26.5
	13
	14
	15
	16	22.3			22.2			27.4	28.1	28.4	25.3	28.2	28.6
	17
	18
	19
	20							28.9	29.4	29.5	24.5	28.7	29.4
	21
	22
	23
	24							28.7	30.6	31.2	23.1	29.5	31.4
	25
	26
	27
	28							31.1	31.5	31.4		29.4	32.1
	29
	30
	31
	32
	33
	34
	35
	36
	37
	38							31.5	32.2	31.6		27.6	32
	39
	40
	41
	42
	43
	44
	45
	46
	47
	48							32.3	32.5	33.9		26.6	33.5
