# Supplementary material for: NAD+ prevents septic shock-induced death by non-canonical inflammasome blockade and IL-10 cytokine production in macrophages
Source: eLife. 2024 Feb 19;12:RP88686. doi: 10.7554/eLife.88686 (PMC10942599; doi:10.7554/eLife.88686)
Supplement: Figure 1—source data 5. [file elife-88686-fig1-data5.xlsx]

## Sheet: Tabelle1
F)
	IL-1β					IL-18	IL-18				TNF-alpha	TNF-alpha				IL-6	IL-6
	PBS	NAD+	PBS	NAD+		PBS	NAD+	PBS	NAD+		PBS	NAD+	PBS	NAD+		PBS	NAD+	PBS	NAD+
	4143.41	767.544	14495.1	1239.96		3736.32	2022.05	9397.56	3866.57		1235.82	572.601	1349.87	721.489		44.3809	18.7632	72.0463	22.1275
	4518.12	792.831	9834.21	1074.44		8526.06	2179.11	7605.4	6041.81		1477.29	601.75	1204.19	805.962		71.8451	21.4786	98.615	65.984
	4050.3	819.268	7846.85	1161.8		7601.57	2280.63	8469.24	5067.51		974.37	813.062	1850.36	954.214		55.0294	33.6185	63.1642	41.2136
	5429.61	1150.3	9914.67	1659.5		7673.08	6120.34	7187.21	4688.91		1011.62	417.324	1577.05	532.689		79.1043	28.4506	84.7329	47.8601
	4422.72	659.498	11506.6	1412.37		7291.28	2103.14	8738.03	3969.36		1482.8	483.547	1038.16	697.313		55.9712	43.0279	69.5871	33.4763
	4605.47	848.003	9527.31	1187.08		6610.68	2265.95	7963.58	4560.38		1261.26	661.021	890.172	938.746		68.2364	25.789	106.052	51.7189
