# Supplementary material for: NAD+ prevents septic shock-induced death by non-canonical inflammasome blockade and IL-10 cytokine production in macrophages
Source: eLife. 2024 Feb 19;12:RP88686. doi: 10.7554/eLife.88686 (PMC10942599; doi:10.7554/eLife.88686)
Supplement: Figure 2—source data 3. [file elife-88686-fig2-data3.xlsx]

## Sheet: Tabelle1
Figure 2
B)
				LPS + CTB								LPS + CTB
	IL-1β				LDH	LDH			IL-1β	IL-1β			LDH	LDH
	PBS	NAD+	unstim		PBS	NAD+	unstim		PBS	NAD+	unstim		PBS	NAD+	unstim
	2327.61	333.822	32.7272		64.6137	20.1727	13.5941		2897.2	2623.76	138.241		78.0438	74.9077	11.5001
	3019.12	471.745	25.5292		65.4573	20.636	14.2061		2327.25	2448.39	144.138		72.5119	75.6663	12.8051
	2362.82	462.899	25.2002		71.8435	19.9847	13.2007		2563.77	2723.88	122.602		73.3846	77.8378	11.3778
	2216.99	476.13			73.3078	20.1901			2961.93	2499.42			72.6322	73.9739
	1750.5	474.13			72.2107	24.3646			2520.95	2485.96			72.4752	73.3275
		502.283			73.9416	26.9129							74.7834	73.9045
					66.4277	30.1257
					69.2558	42.1462
