# Supplementary material for: NAD+ prevents septic shock-induced death by non-canonical inflammasome blockade and IL-10 cytokine production in macrophages
Source: eLife. 2024 Feb 19;12:RP88686. doi: 10.7554/eLife.88686 (PMC10942599; doi:10.7554/eLife.88686)
Supplement: Figure 2—source data 7. [file elife-88686-fig2-data7.xlsx]

## Sheet: Tabelle1
Figure 2
F)	IL-1β				LDH
	PBS	NAD+	Control		PBS	NAD+	Control
	1940.1	1098.67	11.2186		76.7957	44.1292	5.13693
	2076.38	788.333	50.521		79.7885	32.2032	5.40341
	2637.33	938.907			86.4956	39.554
	2308.62	1102.24			79.8992	44.9656
	2486.24	1378.89			85.5731	47.409
	2628.91	941.459			81.8383	23.5774
