# Supplementary material for: NAD+ prevents septic shock-induced death by non-canonical inflammasome blockade and IL-10 cytokine production in macrophages
Source: eLife. 2024 Feb 19;12:RP88686. doi: 10.7554/eLife.88686 (PMC10942599; doi:10.7554/eLife.88686)
Supplement: Figure 3—source data 1. [file elife-88686-fig3-data1.xlsx]

## Sheet: Tabelle1
Figure 3
E)	IL-1β					LDH
			IFN-β					IFN-β
	PBS	NAD+	PBS	NAD+		PBS	NAD+	PBS	NAD+
	2162.43	806.21	1728.67	2527.2		80.8599	16.34	69.1807	77.218
	2375.88	521.888	2041.75	2679.04		62.092	28.3226	63.7774	62.7477
	2002.38	697.171	2372.63	2227.3		56.4177	22.2582	62.1678	73.2617
	2021.38	577.862	2429.29	2318.37		61.2899	27.5964	68.693	77.4456
	2457.36	703.162	2042.95	2798.69		66.6335	39.888	66.433	70.4814
	2334.8	505.284	2486.29	2402.07		71.8959	25.0872	62.8236	73.5814
