# Supplementary material for: NAD+ prevents septic shock-induced death by non-canonical inflammasome blockade and IL-10 cytokine production in macrophages
Source: eLife. 2024 Feb 19;12:RP88686. doi: 10.7554/eLife.88686 (PMC10942599; doi:10.7554/eLife.88686)
Supplement: Figure 5—source data 1. [file elife-88686-fig5-data1.xlsx]

## Sheet: Tabelle1
Figure 5
A)	PBS			NAD+			Casp 11-/-			Casp 11-/- + NAD+
	Time	Death		Time	Death		Time	Death		Time	Death
	12	1		100	0		100	0		33	1
	12	1		100	0		100	0		36	1
	14	1		100	0		100	0		40	1
	14	1		100	0		100	0		100	0
	16	1		100	0		94	1		100	0
