# Supplementary material for: NAD+ prevents septic shock-induced death by non-canonical inflammasome blockade and IL-10 cytokine production in macrophages
Source: eLife. 2024 Feb 19;12:RP88686. doi: 10.7554/eLife.88686 (PMC10942599; doi:10.7554/eLife.88686)
Supplement: Figure 5—source data 2. [file elife-88686-fig5-data2.xlsx]

## Sheet: Tabelle1
Figure 5
B)
	Macrophages			Dendritic Cells
	PBS	NAD+		PBS	NAD+
	0.738255	3.3557		1.01351	0.945946
	1.07383	4.02685		0.912162	0.709459
	1.81208	2.75168		1.08108	0.709459
	0.838926	3.32215		1.18243	0.675676
	0.536913	3.3557		0.810811	0.844595
