# Supplementary material for: NAD+ prevents septic shock-induced death by non-canonical inflammasome blockade and IL-10 cytokine production in macrophages
Source: eLife. 2024 Feb 19;12:RP88686. doi: 10.7554/eLife.88686 (PMC10942599; doi:10.7554/eLife.88686)
Supplement: Figure 5—source data 4. [file elife-88686-fig5-data4.xlsx]

## Sheet: Tabelle1
Figure 5
D)
	IL-1β					LDH
			IL-10 & IL-10R-	IL-10 & IL-10R-				IL-10 & IL-10R-	IL-10 & IL-10R-
	PBS	NAD+	PBS	NAD+		PBS	NAD+	PBS	NAD
	2520.01	585.394	2370.92	1970.2		70.5194	30.7398	71.6304	41.5952
	1929.8	720.109	2526.35	1338.56		62.3033	28.5936	63.2897	37.8394
	2243.39	892.653	2648.22	2165.51		73.24	26.7835	69.2946	42.2292
	2452.74	696.658	2301.59	1343.73		57.5937	25.7971	89.683	27.4284
	2527.2	849.175	2058.7	1513.68		64.986	20.4914	74.584	26.7456
	2808.96	1043.8	2203.17	1747.5		68.9802	27.0816	59.9241	30.588
