# Supplementary material for: NAD+ prevents septic shock-induced death by non-canonical inflammasome blockade and IL-10 cytokine production in macrophages
Source: eLife. 2024 Feb 19;12:RP88686. doi: 10.7554/eLife.88686 (PMC10942599; doi:10.7554/eLife.88686)
Supplement: Figure 5—source data 5. [file elife-88686-fig5-data5.xlsx]

## Sheet: Tabelle1
Figure 5
E)
	PBS			NAD+			IL-10 -/- NAD			IL-10 -/-
	Time	Death		Time	Death		Time	Death		Time	Death
	12	1		20	1		18	1		10	1
	12	1		48	0		18	1		10	1
	16	1		48	0		24	1		12	1
	16	1		48	0		26	1		12	1
	16	1		48	0		48	0		12	1
	18	1		48	0		48	0
							48	0
