# Supplementary figures and images for: NAD+ prevents septic shock-induced death by non-canonical inflammasome blockade and IL-10 cytokine production in macrophages
Source: eLife journal article supplement (doi:10.7554/elife.88686), 2023-08-16

C1-C4    N1-N5    N1-N5

55 •  
35 •  
25 •  
15 •  
10 •

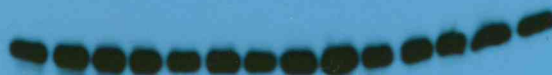

Pro-  
CASPASE  
Ab cam  
anti 3

Pro Casp 1

Supplement: fig2-data1 [file elife-88686-fig2-data1-v1.zip]

Actin

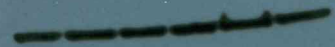

L

- . 250
- . 130
- . 95
- \* 72
- . 55
- . 36
- \* 28
- ┘

Supplement: fig2-data1 [file elife-88686-fig2-data1-v1.zip]

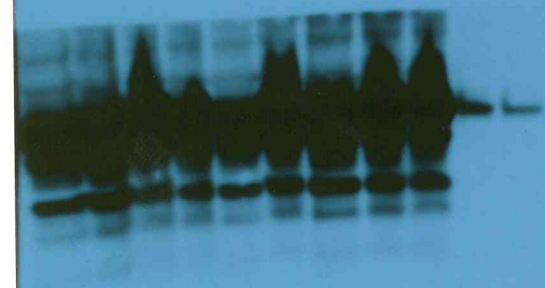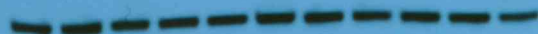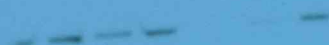

Supplement: fig2-data1 [file elife-88686-fig2-data1-v1.zip]

9D

$$\frac{N_A - N_S}{N} \quad \frac{C_1 - C_2}{C} \times \times$$

4 3 2 1 4 3 2 1 x x

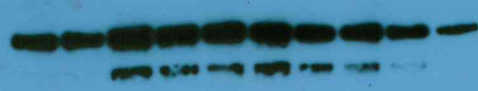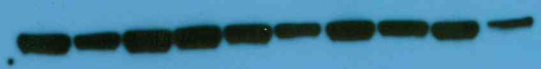

.95  
.82  
.55  
( )  
.34  
.26  
.17

6SPms

Supplement: fig2-data1 [file elife-88686-fig2-data1-v1.zip]

KDa <sup>page</sup>  
 ruler <sup>miles</sup>  
 72 \*  
 55 -  
 43 -  
 34 -  
 26 -  
 17 -

1 2 3 4 5 6 Novex

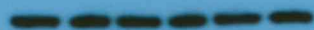

72 \*  
 55 -  
 43 -  
 34 -

1 2 3 4 5 6 Nov

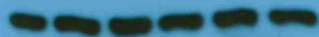

^p

①

Supplement: fig2-data1 [file elife-88686-fig2-data1-v1.zip]

# IL-1beta

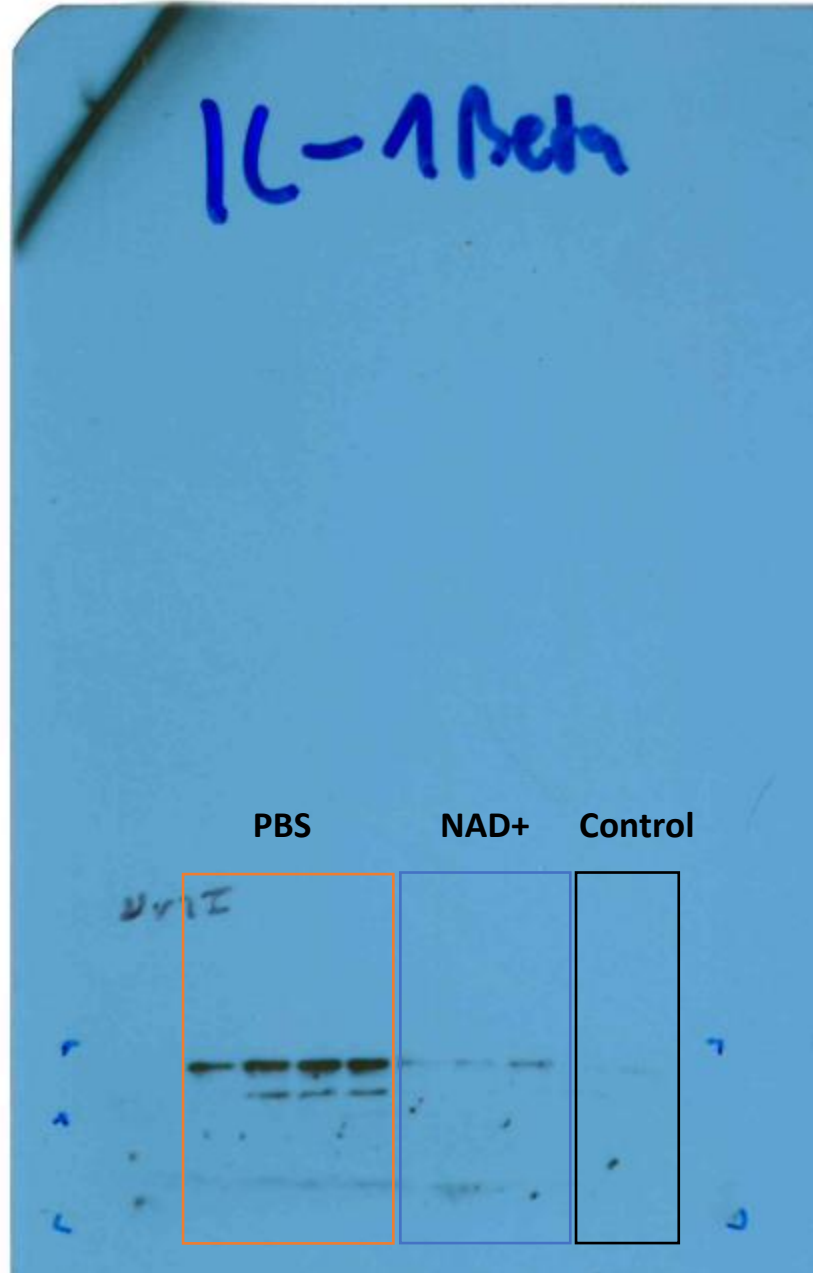

Supplement: fig2-data2 [file elife-88686-fig2-data2-v1.zip]

# NLRP3

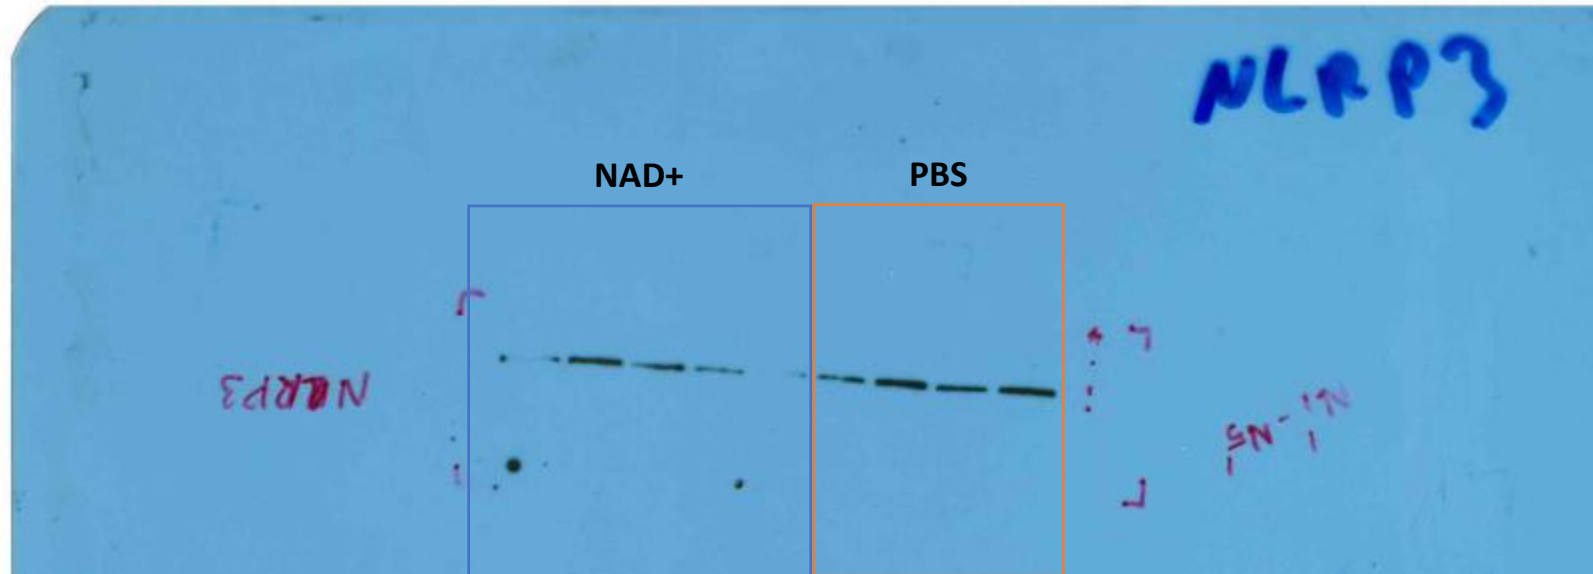

Supplement: fig2-data2 [file elife-88686-fig2-data2-v1.zip]

# Actin

NAD+

PBS

Control

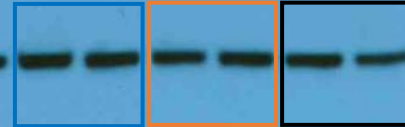

Supplement: fig2-data2 [file elife-88686-fig2-data2-v1.zip]

# Casp 1

NAD+    PBS    Control

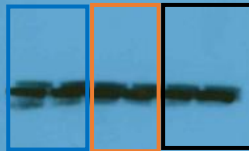

# NLRP3

NAD+    PBS    Control

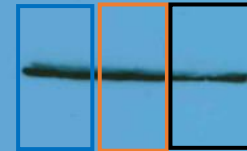

Supplement: fig2-data2 [file elife-88686-fig2-data2-v1.zip]

# Pro Casp 1

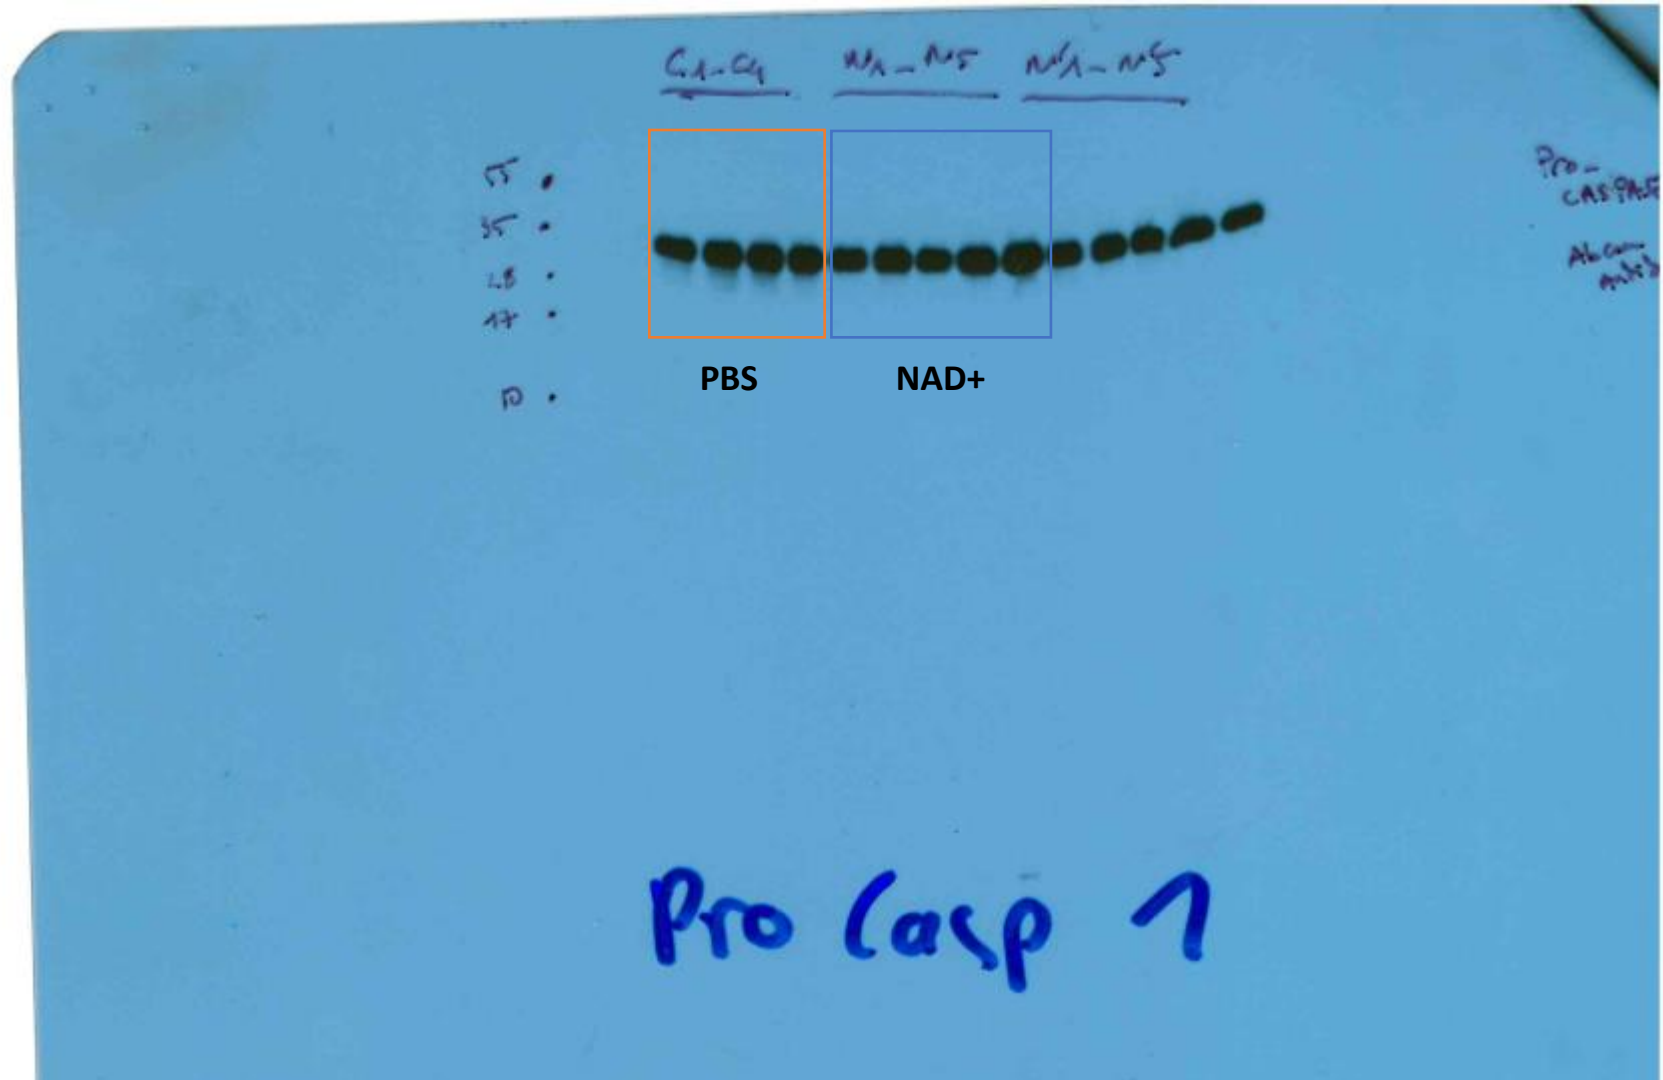

Supplement: fig2-data2 [file elife-88686-fig2-data2-v1.zip]

# GSDMD

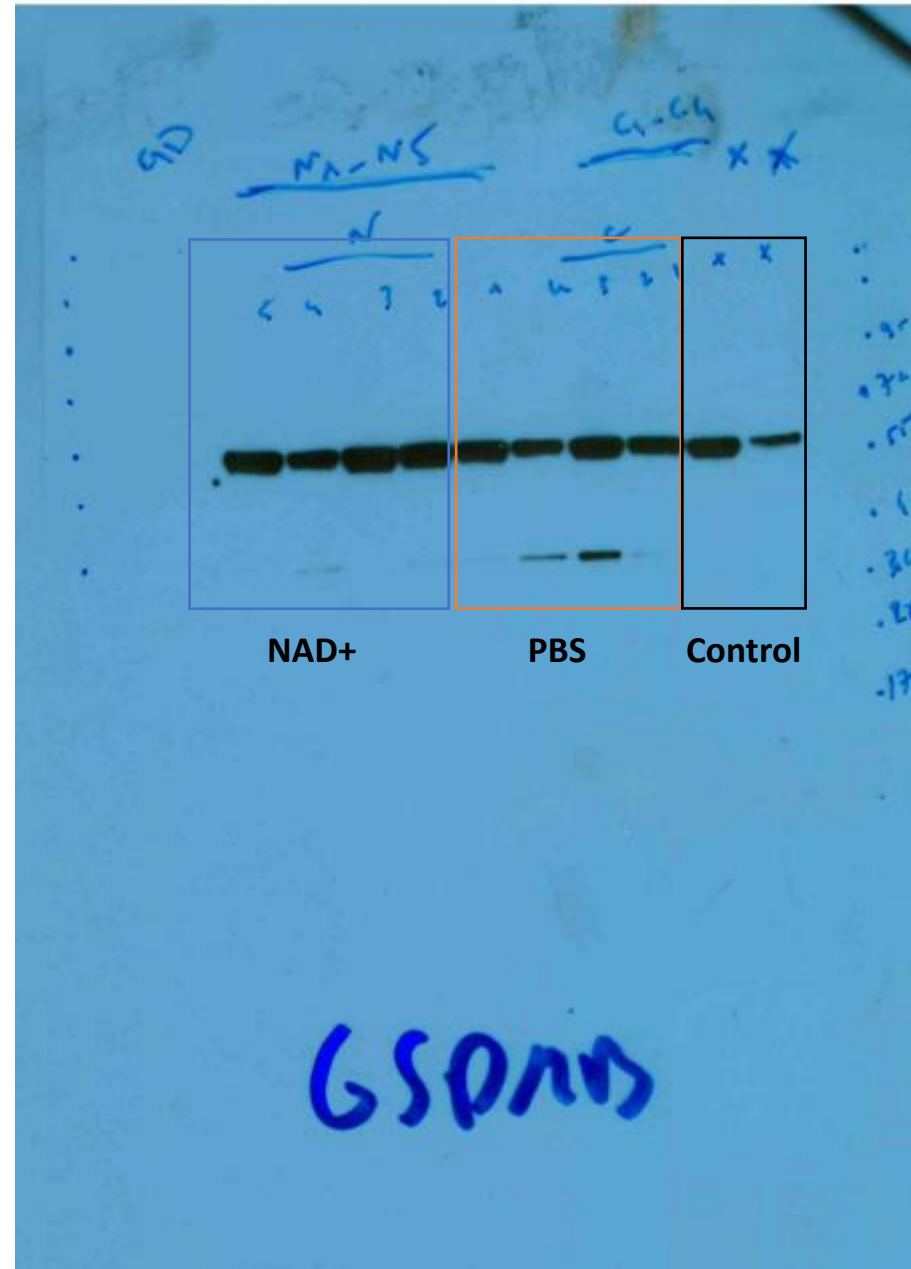

Supplement: fig2-data2 [file elife-88686-fig2-data2-v1.zip]

# Actin

Actin

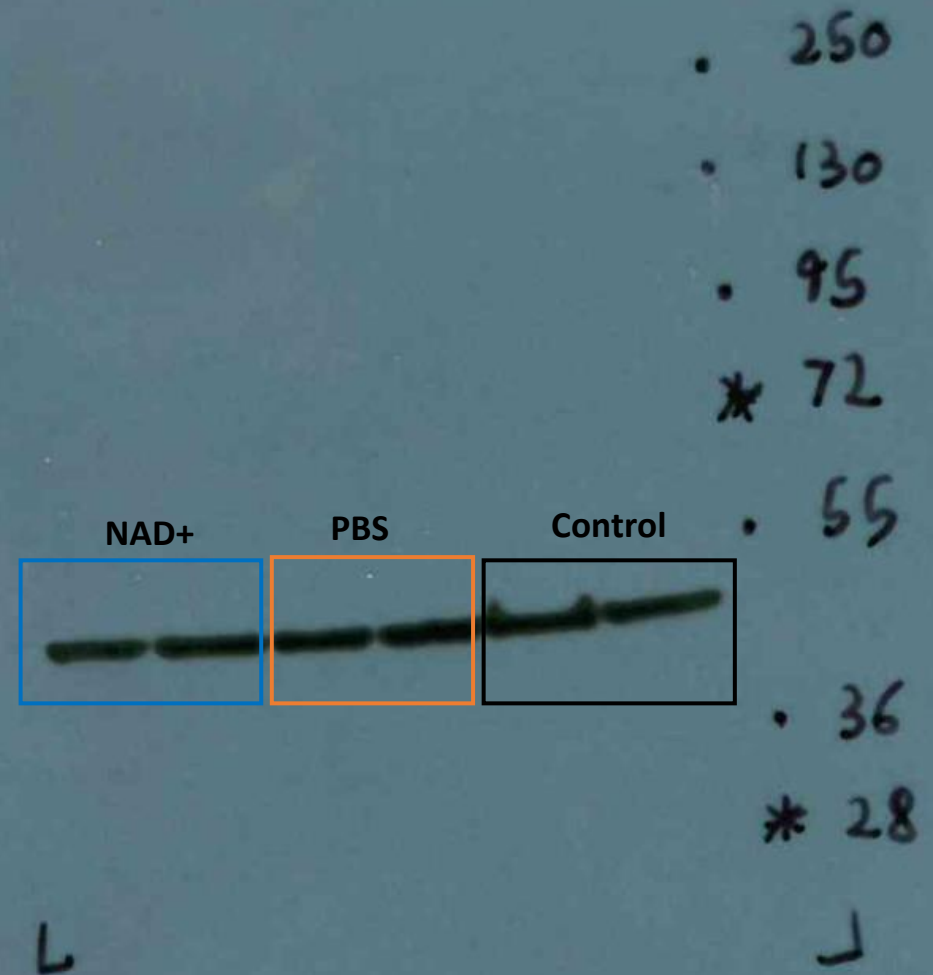

Supplement: fig2-data2 [file elife-88686-fig2-data2-v1.zip]

# IL-1beta & Casp 1

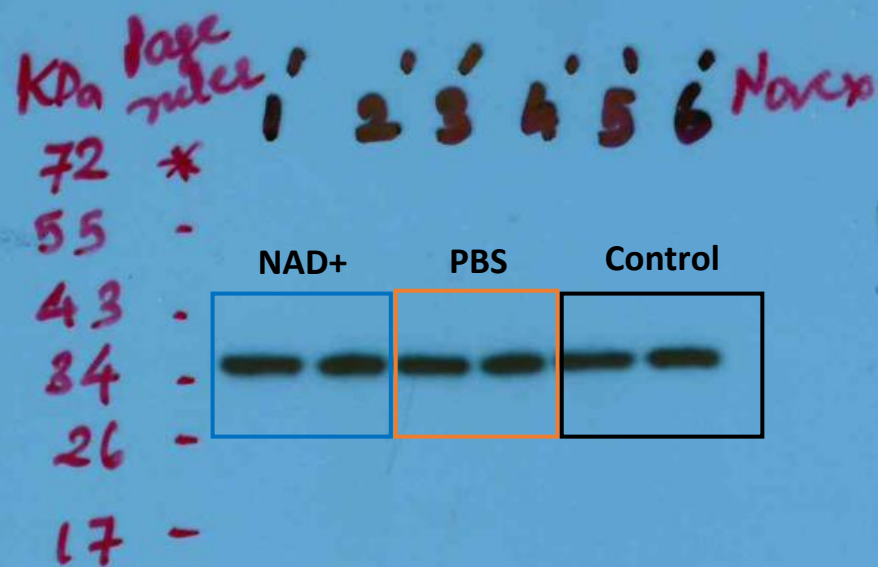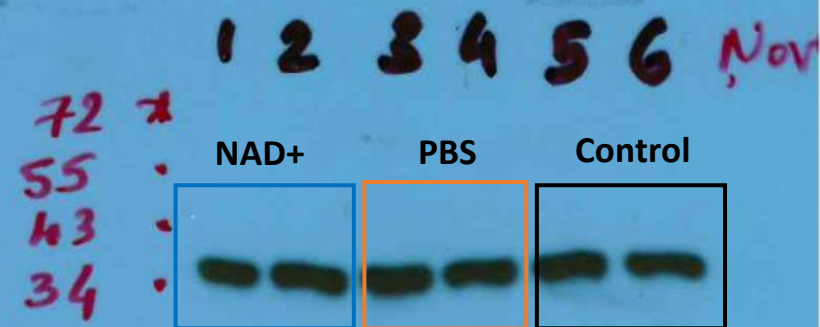

^ B

①

Supplement: fig2-data2 [file elife-88686-fig2-data2-v1.zip]

# GSDMD

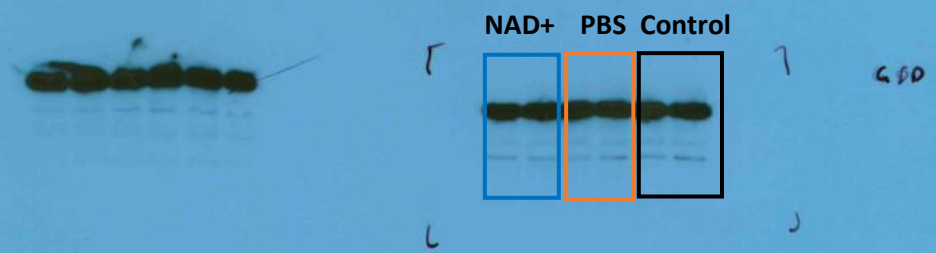

# Pro Casp 11 & Casp 11

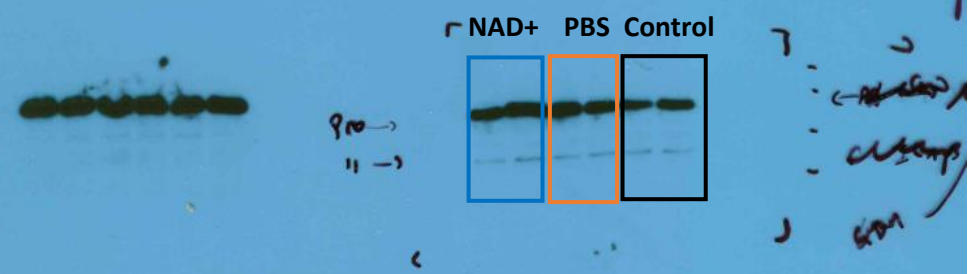

Supplement: fig2-data2 [file elife-88686-fig2-data2-v1.zip]

# Casp 11

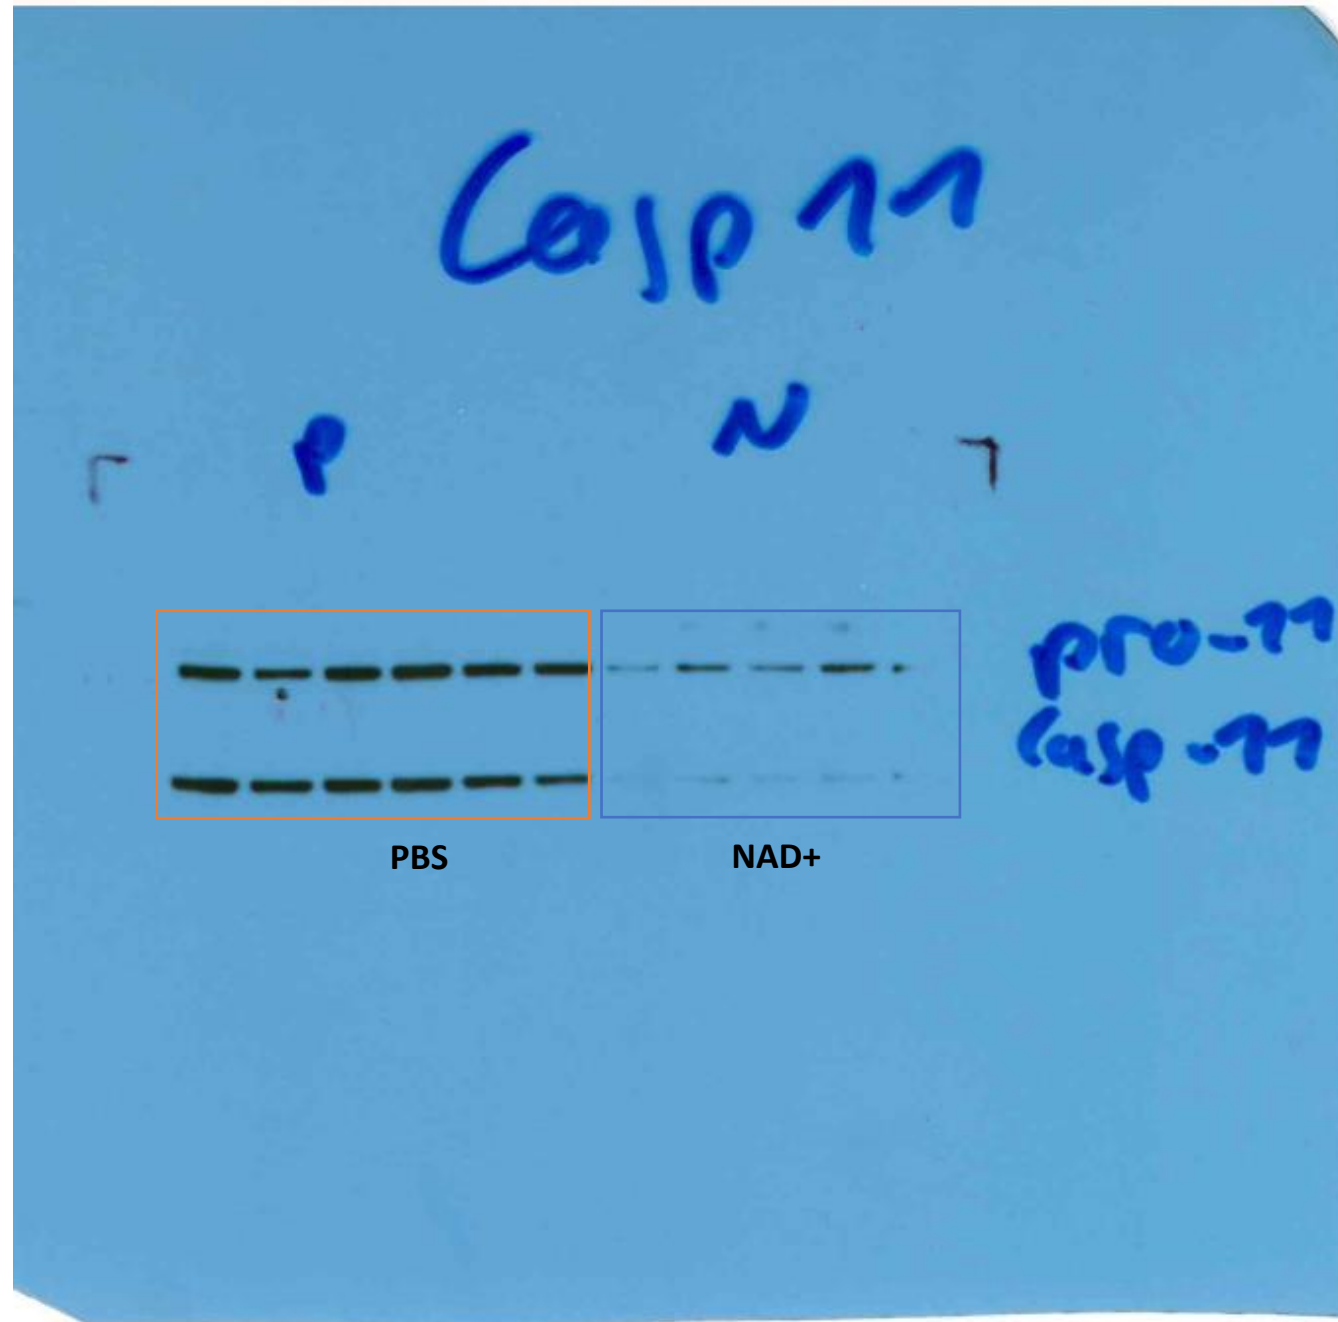

Supplement: fig2-data2 [file elife-88686-fig2-data2-v1.zip]

# Casp 1

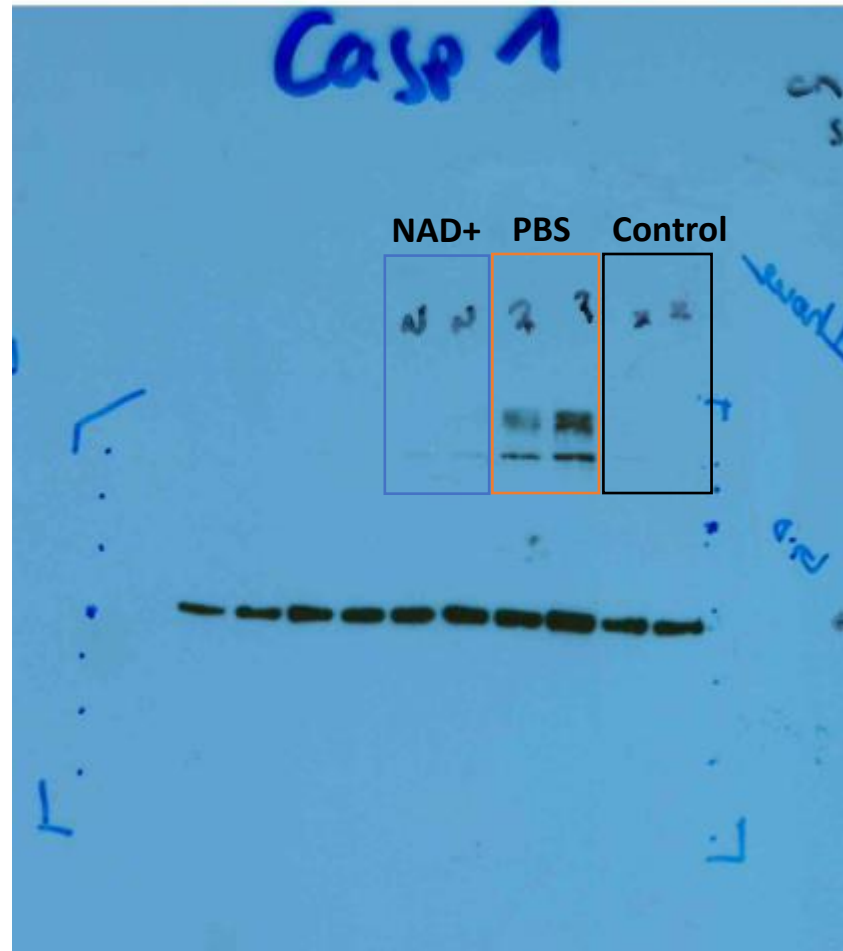

Supplement: fig2-data2 [file elife-88686-fig2-data2-v1.zip]

p52

Control PBS NAD<sup>+</sup>

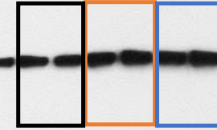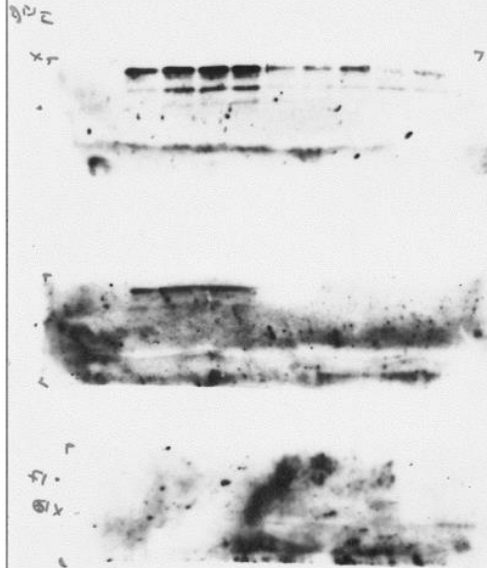

Supplement: fig2-figsupp1-data2 [file elife-88686-fig2-figsupp1-data2-v1.zip]

# p65

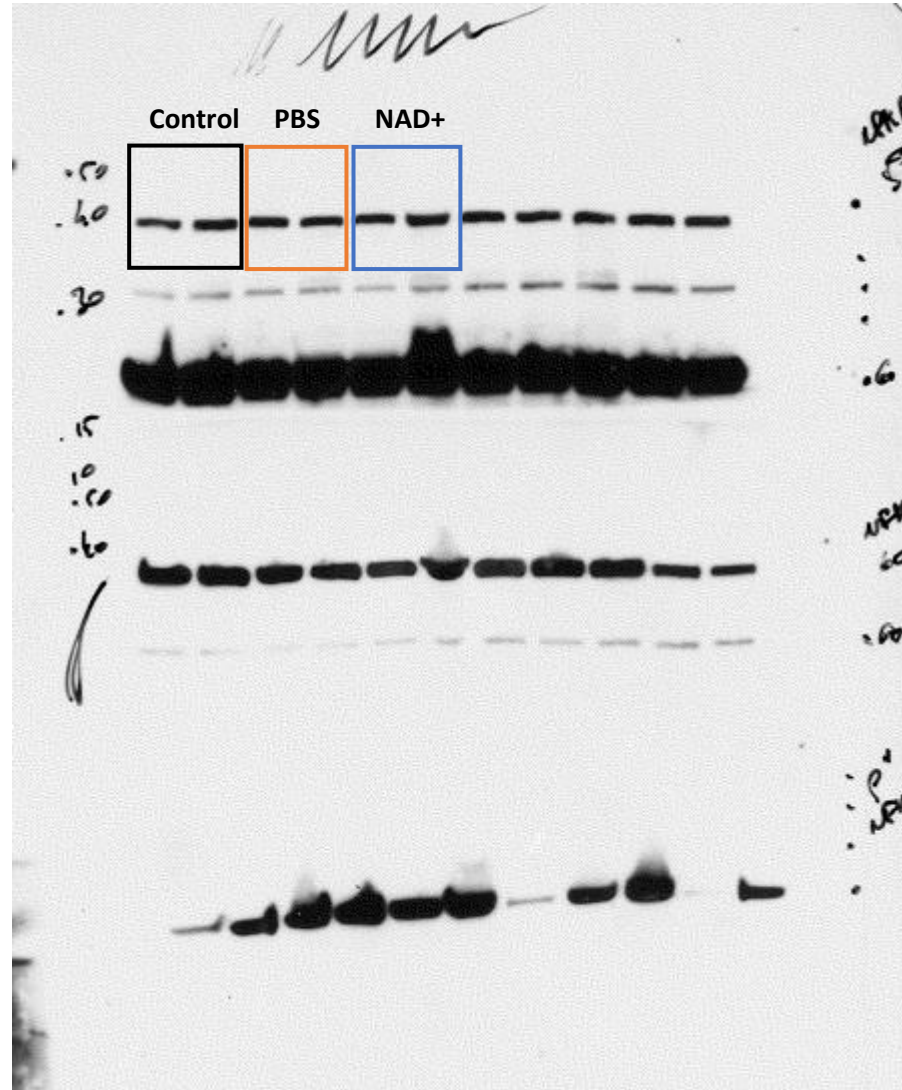

Supplement: fig2-figsupp1-data2 [file elife-88686-fig2-figsupp1-data2-v1.zip]

pro-casp-1  
CFL-1

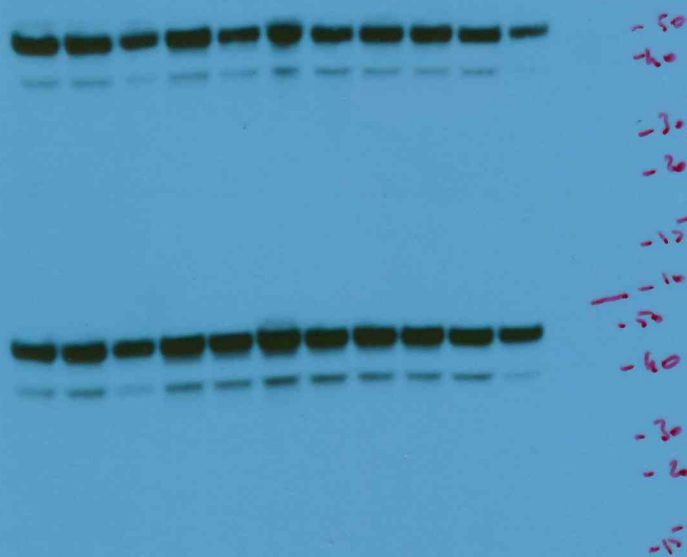

Pro caspase 1

Pro caspase 1

Supplement: fig3-data2 [file elife-88686-fig3-data2-v1.zip]

NC 63  
 6-5-79  
 JEN 42

N    W    3    X    N    W    3    X

NC 63

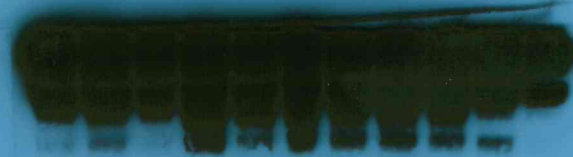

-50  
 -60

Protease

Protease

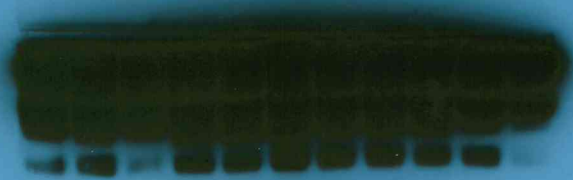

-50  
 -60  
 -70  
 -80  
 -90  
 -100

Protease

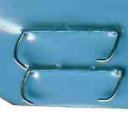

Supplement: fig3-data2 [file elife-88686-fig3-data2-v1.zip]

N N N N<sup>1/2</sup> N<sup>1/2</sup> N<sup>1/2</sup> 91 92 93 X X 650mD

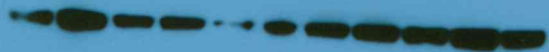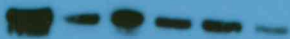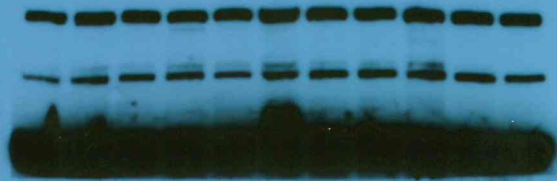

Casp-11

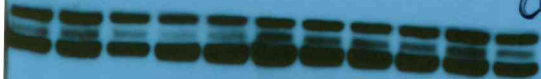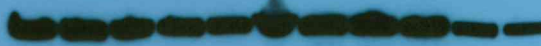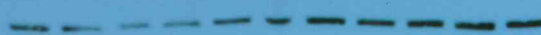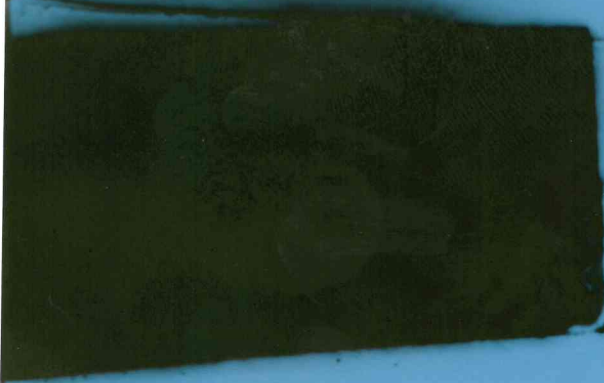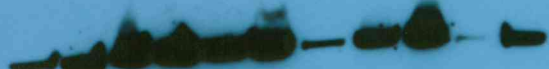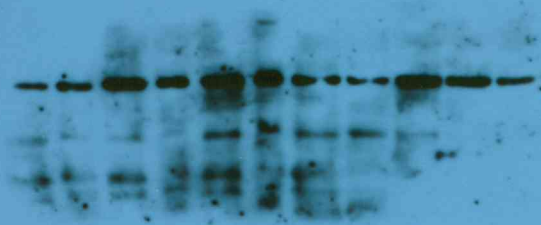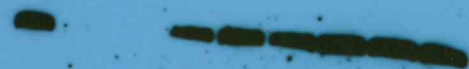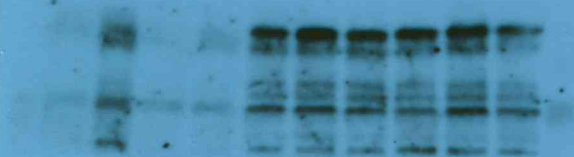

Supplement: fig3-data2 [file elife-88686-fig3-data2-v1.zip]

# NLRP 3

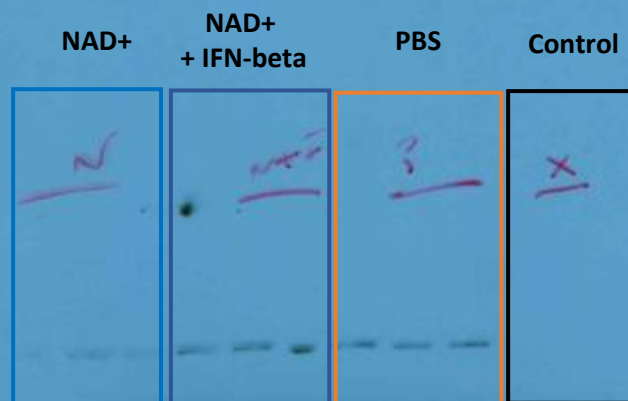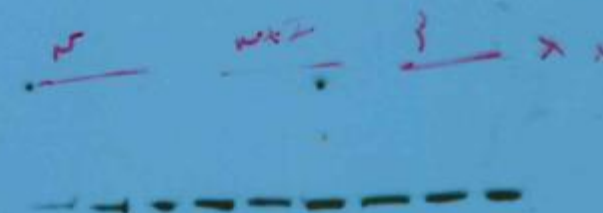

Supplement: fig3-data3 [file elife-88686-fig3-data3-v1.zip]

**GSDMD**

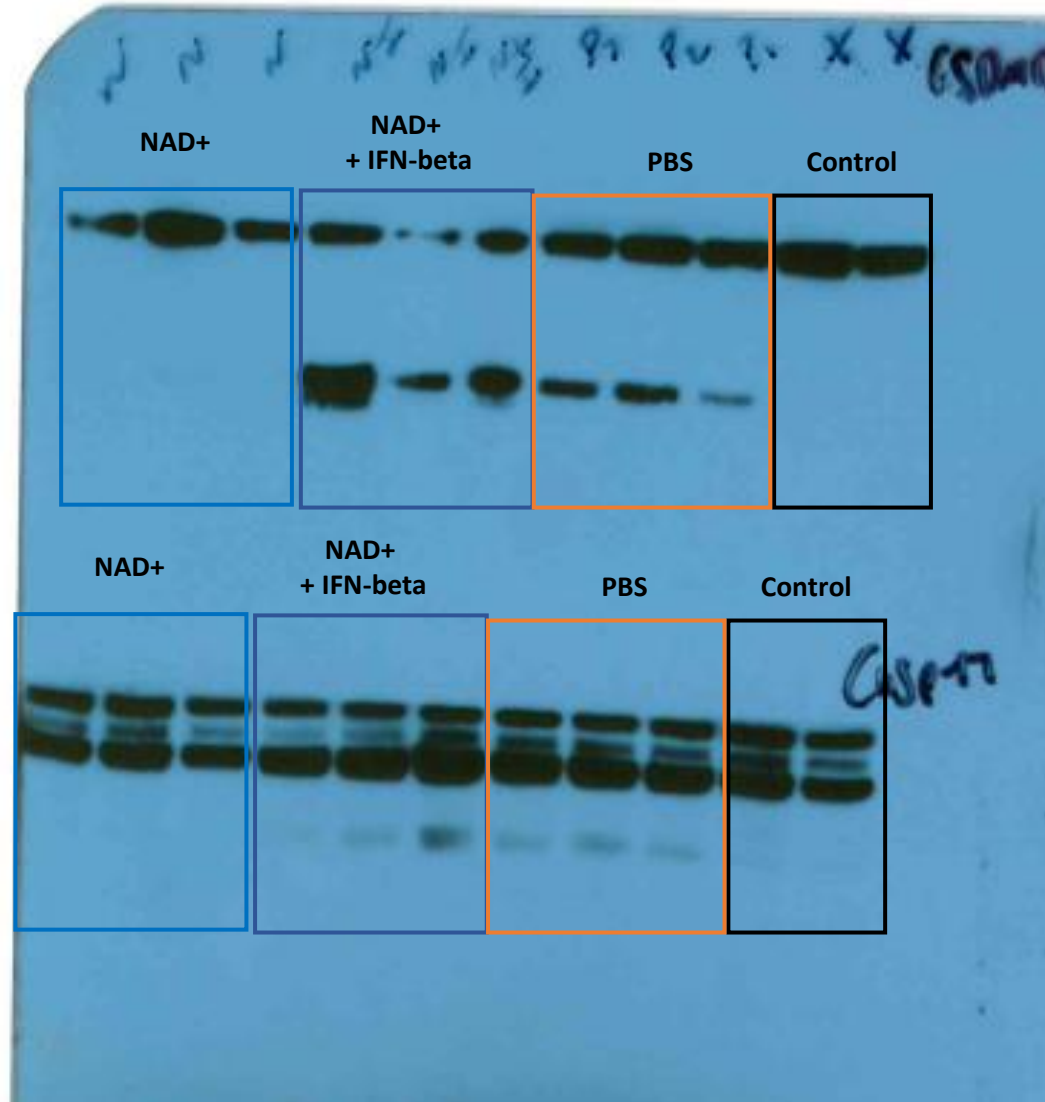

**Casp 11**

Supplement: fig3-data3 [file elife-88686-fig3-data3-v1.zip]

# Pro Casp 1

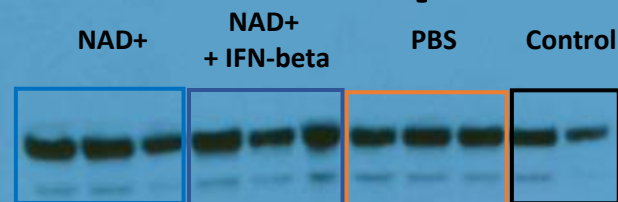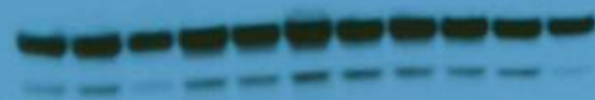

-50  
-40  
-30  
-20  
-15  
-10  
-5  
-40  
-30  
-20  
-15

Pro-casp-1  
CASP-1

Pro caspase 1

Pro caspase 1

Supplement: fig3-data3 [file elife-88686-fig3-data3-v1.zip]

# Actin

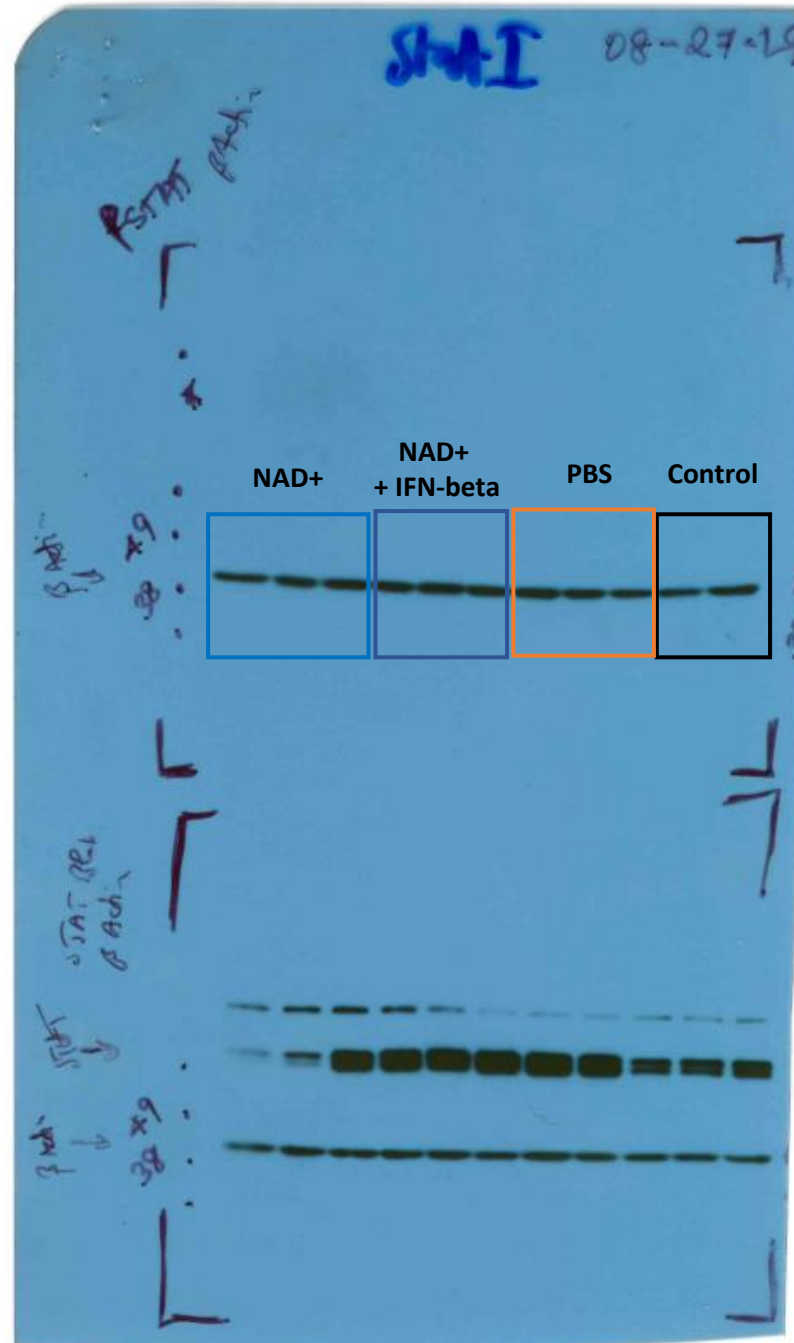

Supplement: fig3-data3 [file elife-88686-fig3-data3-v1.zip]

Phospho Slot I

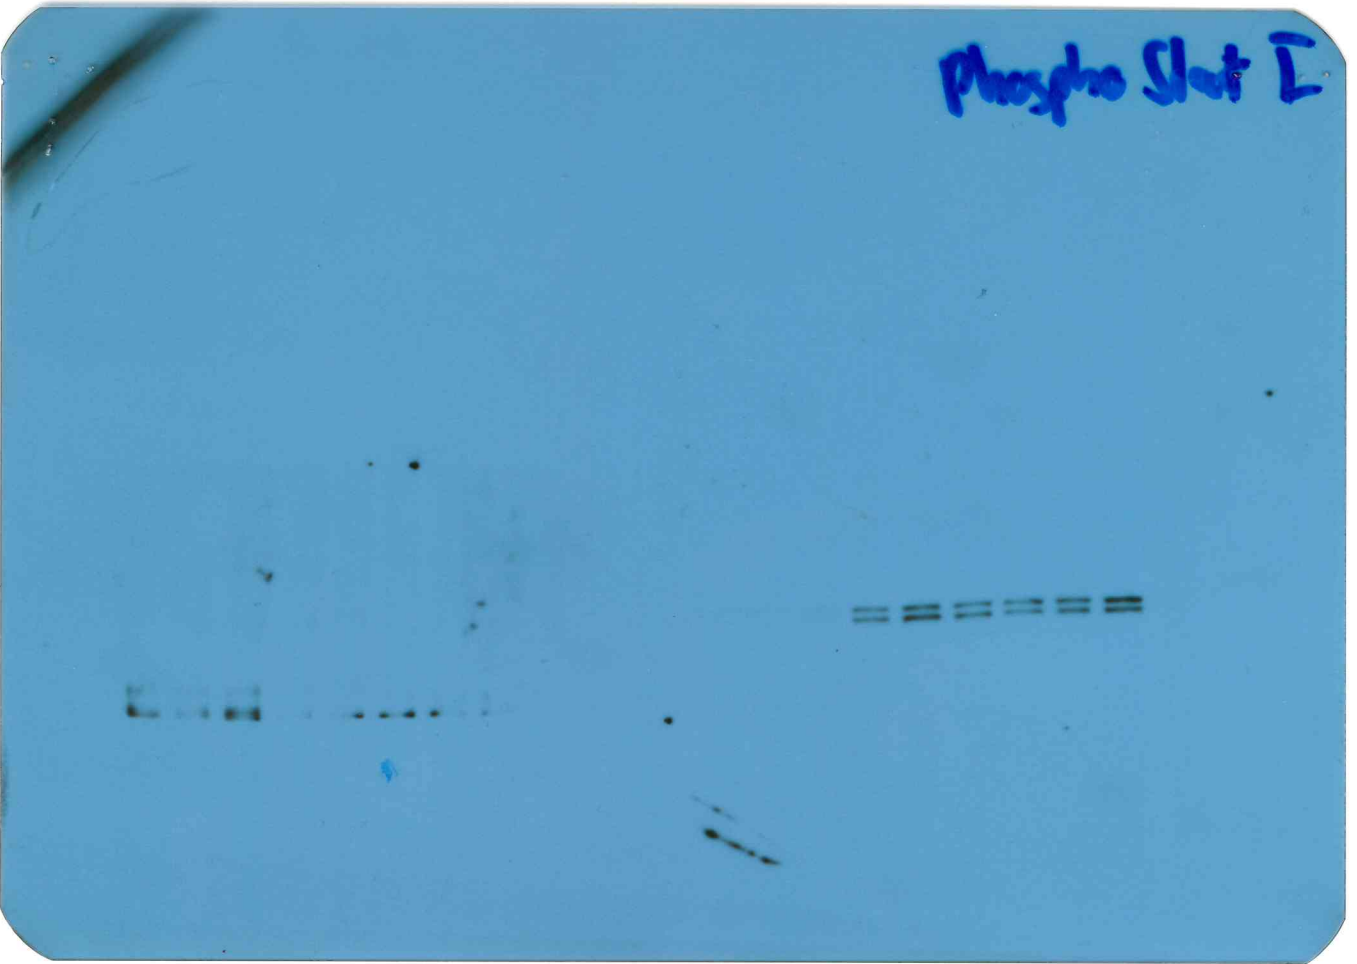

Supplement: fig3-data4 [file elife-88686-fig3-data4-v1.zip]

Phospho Stat E

STAT1-P

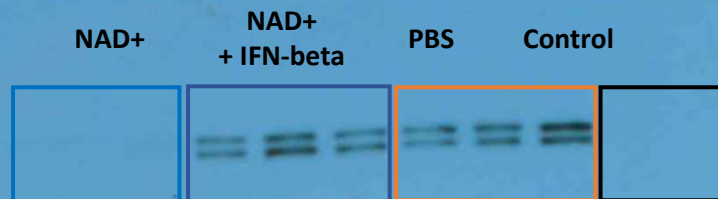

Supplement: fig3-data5 [file elife-88686-fig3-data5-v1.zip]

# STAT1

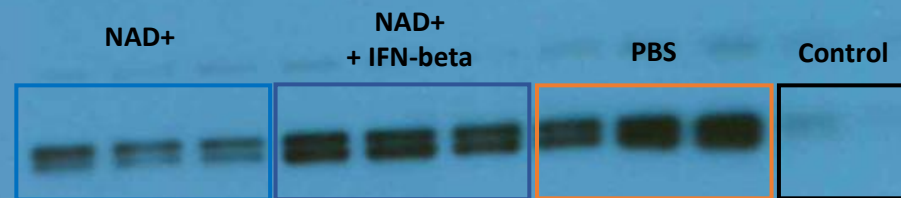

Stat 1 (p91) + IFN

Supplement: fig3-data5 [file elife-88686-fig3-data5-v1.zip]
